# Supplementary material for: Transfer of diazotroph-derived nitrogen to the planktonic food web across gradients of N 2 fixation activity and diversity in the Western Tropical South Pacific
Source: Copernicus journal article supplement (doi:10.5194/bg-2017-572), 2018-01-05
Supplement: Supplementary file 1 [file bg-2017-572-supplement.pdf]

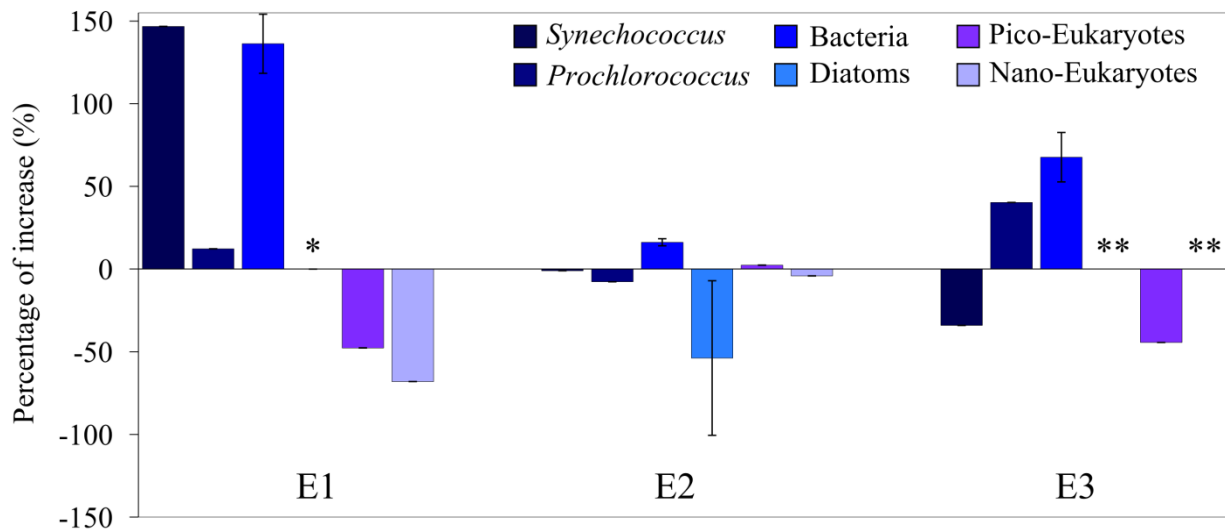

5 Figure 1: Relative increase of cells abundance associated to *Synechococcus*, *Prochlorococcus*, bacteria, diatoms, pico-eukaryotes and nano-eukaryotes (blue pattern) after 48 h for E1, E2 and E3. Error bars represent the standard deviation of triplicate counts and the propagated analytical errors. \* Diatoms were not counted at T0. \*\* Diatoms and nano-eukaryotes were not analyzed for E3.
